# Supplementary material for: Impact of the Coronavirus Pandemic on High-Risk Infant Follow-Up (HRIF) Programs: A Survey of Academic Programs
Source: MDPI journal article supplement (doi:10.3390/children8100889), 2021-10-06
Supplement: s1 [file s1]

# Current state of Neonatal High risk Follow clinic in era of coronavirus pandemic - A National Survey

You are being asked to take part in this research study because you are a practicing neonatologist and we are hoping to learn about how current coronavirus pandemic is affecting care in neonatal high risk follow up clinic (During the year 2020). There are minimal risks from this study, which include a possible breach of confidentiality. However, your responses are de-identified and cannot be linked back to you. Participation is voluntary and will take 10-15 minutes. Completion of this study implies consent. If you are a Texas Tech University Health Sciences El Paso's employee, your decision to participate will not be shared with your supervisor and will not have any effect on your performance evaluation or employment status. Please do not hesitate to contact us with questions by email (ajay.singh@ttuhsc.edu or sanjeet.panda@ttuhsc.edu) or phone (915-215-4987).

Does your program have A High-Risk Infant Follow-Up (HRIF) Clinic?

- ☐ Yes  
☐ No

## High Risk Neonatal Follow Up Clinic

Which of the following best describes Your current Role ?

- ☐ HRIF Clinic Director  
☐ Neonatal-Perinatal Medicine Medical Director  
☐ Division Chief (NICU)  
☐ HRIF Clinic Coordinator  
☐ Other

Please Specify

\_\_\_\_\_

Please Specify Name of Hospital/University System With Which Your HRIF Clinic Is Affiliated With

\_\_\_\_\_  
(Please specify city and country of location)

## Demographics of Your NICU

Number of Admissions in your NICU Per Year (averaged over last 3 years)

- ☐ < 250  
☐ 251-500  
☐ 501-750  
☐ 751-1000  
☐ >1000  
(Per Year)

How Many Total Beds In NICU

\_\_\_\_\_  
(Total Beds)

## High Risk Clinic

Current Criteria For Referral to HRIF clinic

- ☐ All NICU discharges  
☐ All Less than 32 weeks Gestation or 1500 gram  
☐ All Less than 36 weeks Gestation or 2500 gram  
☐ Genetic anomalies  
☐ HIE  
☐ Seizures disorder  
☐ Major Malformations(Medical or surgical)  
☐ Others, please specify  
(Check all that apply)

Other

\_\_\_\_\_

What was the frequency of HRIF clinic at your program?  
(Pre-Pandemic)

- ☐ One half-day per week  
☐ One full day per week  
☐ Two full days per week  
☐ More than two full days per week

Average Census Per HRIF Clinic Day (Pre-Pandemic)

- ☐ < 5  
☐ 5-10  
☐ 10-20  
☐ >20

Did You Cancel High-Risk Clinic This year due to COVID  
Pandemic?

- ☐ No  
☐ < 1 month  
☐ 1-3 months  
☐ 3-5 months  
☐ >=6months

How Are You Currently Conducting Neonatal High Risk  
Follow Up Clinic Visits ?

- ☐ All In Person Visits  
☐ All Telemedicine Visits  
☐ Both In Person and Telemedicine Visit

Were your telemedicine visits Multidisciplinary  
(therapists, psychologist, dietitian) during pandemic?

- ☐ Yes  
☐ no  
☐ Other, Please comment

Other, Please Comment

Any Criteria That Would Mandate In Person Visit ?

- ☐ Developmental Testing  
☐ Ventilator Dependency  
☐ Oxygen Dependency  
☐ TPN dependency    ☐ Parental Requests  
☐ New Complaints    ☐ First OR Last HRIF  
 Clinic Visit    ☐ Other  
 (Choose All That Apply)

Please Specify Other

Do You Conduct Periodic Patient Satisfaction Survey  
Particular to High Risk Infant Follow Up Clinic

- ☐ Yes  
☐ No

What Has The Reception Been To Changes Implemented To  
Neonatal High Risk Follow Up Clinic ?

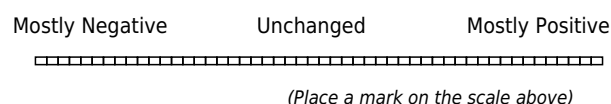

Any Changes To HRIF Clinic frequency Due To On Going  
Pandemic?

- ☐ Decreased Frequency of Clinic Visit Per Patient    ☐ Increased Frequency Of Clinic Visit Per Patient    ☐ No Change

What Changes Have You Noted In Clinic Show Rate During  
On-Going Pandemic

- ☐ Increased Show Rates  
☐ Decreased Show Rates  
☐ No Change In Show Rates

How Are You Approaching Measurement of Vitals For A Telemedicine Encounter ?

- ☐ Discharging Patients with Weighing Machine   ☐ Discharging Patients with Measuring Tape   ☐ Discharging Patients with Pulse Ox   ☐ Asking Parents To Buy Their Own Equipment at Home   ☐ Coordinating with Primary Care Provider to Obtain Vital from those visits   ☐ No Vitals Measured or Asked For   ☐ Other Method  
 (Choose All That Apply)

Please Specify, Other Method

### Personnel Available in Clinic (Choose all that apply, even if not on all clinic days)

|                            | Were Never Part Of Clinic | Available Pre Pandemic   | Available During Pandemic |
|----------------------------|---------------------------|--------------------------|---------------------------|
| Neonatologist              | <input type="checkbox"/>  | <input type="checkbox"/> | <input type="checkbox"/>  |
| Advance Nurse Practitioner | <input type="checkbox"/>  | <input type="checkbox"/> | <input type="checkbox"/>  |
| Registered Nurse           | <input type="checkbox"/>  | <input type="checkbox"/> | <input type="checkbox"/>  |
| Physical Therapist         | <input type="checkbox"/>  | <input type="checkbox"/> | <input type="checkbox"/>  |
| Occupational Therapist     | <input type="checkbox"/>  | <input type="checkbox"/> | <input type="checkbox"/>  |
| Speech Therapist           | <input type="checkbox"/>  | <input type="checkbox"/> | <input type="checkbox"/>  |
| Nutritionist               | <input type="checkbox"/>  | <input type="checkbox"/> | <input type="checkbox"/>  |
| Developmental Specialist   | <input type="checkbox"/>  | <input type="checkbox"/> | <input type="checkbox"/>  |
| General Pediatrician       | <input type="checkbox"/>  | <input type="checkbox"/> | <input type="checkbox"/>  |

### How Are State Funded Therapy Programs Currently Being Administered in Your Area for high risk infants ? (Select Both If Applicable)

|                      | Virtually                | In Person                |
|----------------------|--------------------------|--------------------------|
| Physical Therapy     | <input type="checkbox"/> | <input type="checkbox"/> |
| Occupational Therapy | <input type="checkbox"/> | <input type="checkbox"/> |
| Speech Therapy       | <input type="checkbox"/> | <input type="checkbox"/> |
| Other Therapies      | <input type="checkbox"/> | <input type="checkbox"/> |

### Perception of Clinic

Did Reimbursement/payor policies affect your decision to conduct HRIF clinics in person vs telemedicine

- ☐ Yes, led to do more telemedicine visits  
☐ Yes, led to do more in person visits  
☐ No, did not affect my decision

Did you develop a method to standardize your telemedicine visits?

- ☐ Yes, please comment  
☐ No

Please choose all, that was standardized

- ☐ Intake, and history taking.  
☐ Physical Exam  
☐ Developmental screening/testing, please specify (multiple choice)

Please enumerate all the Developmental screening or Testing (eg. ASQs, HINES) that was standardized for telemedicine visits.

---

What was level of reimbursement for Telemedicine visits, compared to in-person visits.

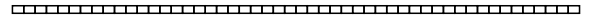

(Place a mark on the scale above)

---

What Is Your Perception Of Changes in High Risk Infant Clinic Format ?

Mostly Negative

Neutral

Mostly Positive

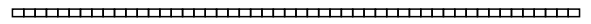

(Place a mark on the scale above)

---

Was your HRIF clinic able to conduct home visits during pandemic ?

☐ Yes   ☐ No   ☐ Home visits were never part of HRIF Clinic

---

Any comments or feedback you would like to share.

---

## Short Follow-up Survey

Thanks for responding to the initial survey, as per feedback from our initial survey responders, we have added 6 more questions to make the survey more useful. You are being asked to take part in this research study because you are a practicing neonatologist and we are hoping to learn about how the current coronavirus pandemic is affecting care in neonatal high risk follow up clinic (During the year 2020).

Please do not hesitate to contact us with questions by email (ajay.singh@ttuhsc.edu or sanjeet.panda@ttuhsc.edu) or phone (915-215-4987).

Were your telemedicine visits Multidisciplinary (therapists, psychologist, dietitian) during pandemic?

- ☐ Yes  
☐ no  
☐ Other, Please comment

Other, Please Comment

Did Reimbursement/payor policies affect your decision to conduct HRIF clinics in person vs telemedicine

- ☐ Yes, led to do more telemedicine visits  
☐ Yes, led to do more in person visits  
☐ No, did not affect my decision

Did you develop a method to standardize your telemedicine visits?

- ☐ Yes, please comment  
☐ No

Please choose all, that was standardized

- ☐ Intake, and history taking.  
☐ Physical Exam  
☐ Developmental screening/testing, please specify (multiple choice)

Please enumerate all the Developmental screening or Testing (eg. ASQs, HINES) that was standardized for telemedicine visits.

What was level of reimbursement for Telemedicine visits, compared to in-person visits.

=====

(Place a mark on the scale above)

Was your HRIF clinic able to conduct home visits during pandemic ?

- ☐ Yes ☐ No ☐ Home visits were never part of HRIF Clinic

Any comments or feedback you would like to share.
